# Supplementary material for: Fast and Cost-Effective Genetic Mapping in Apple Using Next-Generation Sequencing
Source: PubMed Central journal article supplement (PMC4169160; doi:10.1534/g3.114.011023), 2014-07-16
Supplement: supp_g3.114.011023_FigureS2.pdf [file supp_g3.114.011023_FigureS2.pdf]

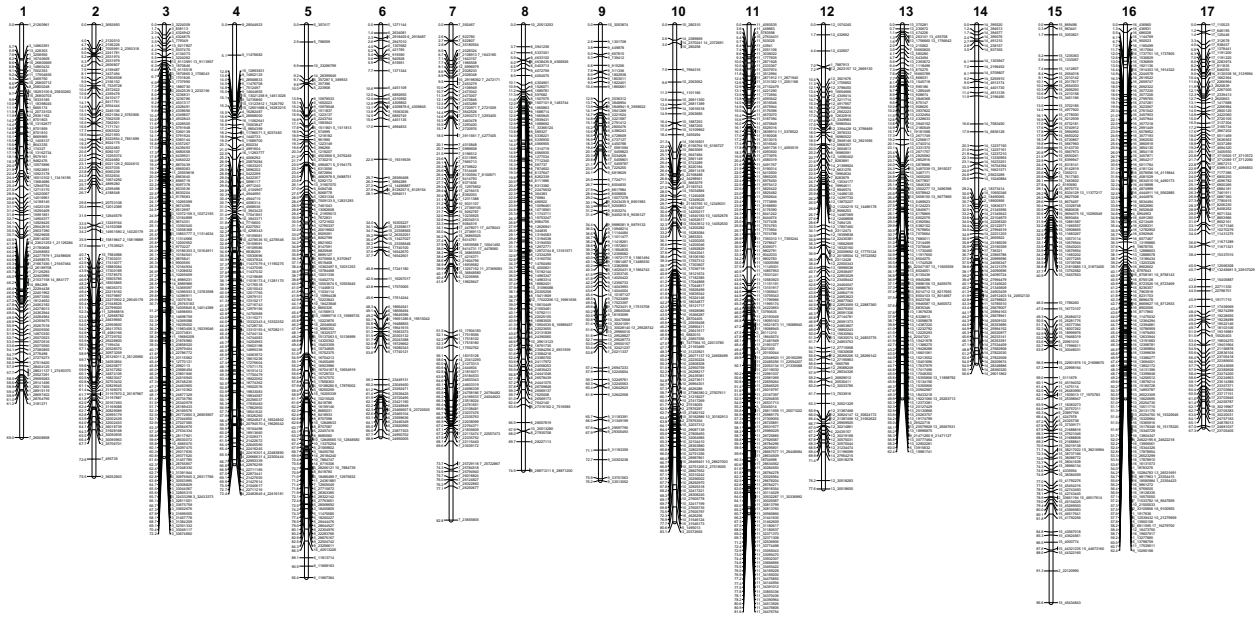

**Figure S2** A composite genetic linkage map of the *Malus x domestica* genome. The map was constructed from 1994 SNPs discovered and genotyped using GBS, including SNPs from all three pseudo-testcross segregation types, in a Golden Delicious x Scarlet Spur F1 population.
