# Supplementary material for: Fast and Cost-Effective Genetic Mapping in Apple Using Next-Generation Sequencing
Source: PubMed Central journal article supplement (PMC4169160; doi:10.1534/g3.114.011023), 2014-07-16
Supplement: supp_g3.114.011023_FigureS3.pdf [file supp_g3.114.011023_FigureS3.pdf]

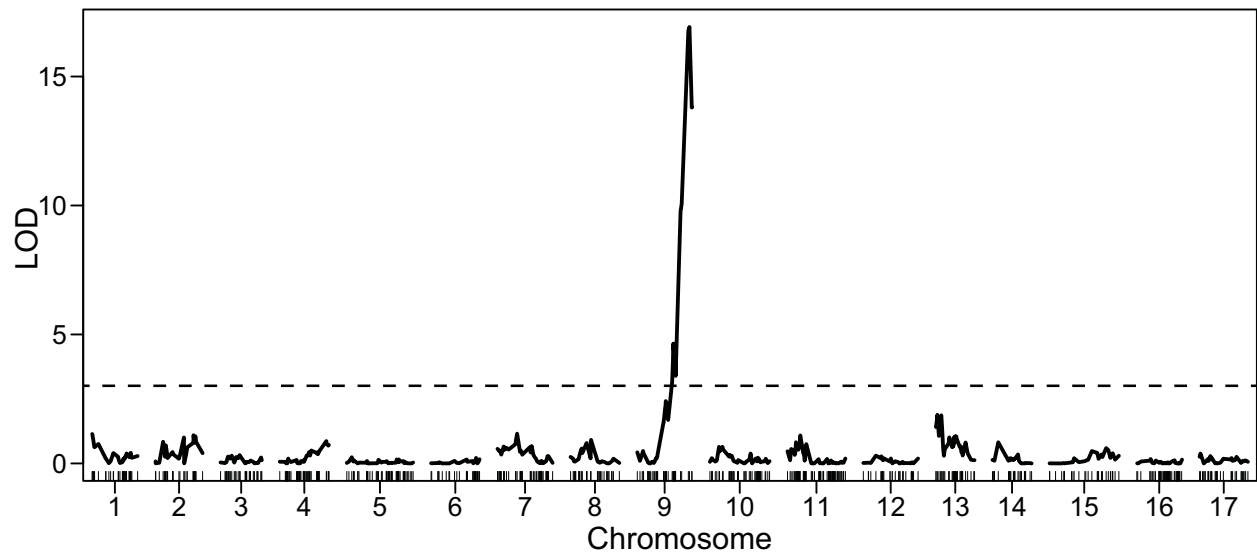

**Figure S3** Genome-wide LOD scores for apple fruit skin color. Each SNP is represented by a single vertical line at the bottom of the plot. Only a single peak associated with skin color was identified on linkage group 9 and this peak overlaps with the known apple skin color locus. The horizontal dashed line represents the significance threshold determined by permutation.
